# Supplementary material for: Composite selection signals can localize the trait specific genomic regions in multi-breed populations of cattle and sheep
Source: PubMed Central journal article supplement (PMC4101850; doi:10.1186/1471-2156-15-34), 2014-03-17
Supplement: 1471-2156-15-34-S3.pdf [file 1471-2156-15-34-S3.pdf]

**Table S3.** Chromosome wise information regarding genotyping data of cattle and sheep

| Chromosome       | CATTLE                       |              |                        |                           |                    | SHEEP                        |              |                           |                    |
|------------------|------------------------------|--------------|------------------------|---------------------------|--------------------|------------------------------|--------------|---------------------------|--------------------|
|                  | Length <sup>a</sup><br>(Mbp) | SNPs<br>(N)  | Ancestral <sup>b</sup> | Density (bp) <sup>c</sup> |                    | Length <sup>a</sup><br>(Mbp) | SNPs<br>(N)  | Density (bp) <sup>c</sup> |                    |
|                  |                              |              |                        | Mean                      | Maximum            |                              |              | Mean                      | Maximum            |
| 1                | 159                          | 2555         | 2550                   | 61,874                    | 1,160,151          | 300                          | 5336         | 56,156                    | 941,607            |
| 2                | 138                          | 2062         | 2058                   | 66,108                    | 1,715,336          | 264                          | 5009         | 52,537                    | 984,461            |
| 3                | 122                          | 1952         | 1947                   | 62,058                    | 1,610,036          | 243                          | 4535         | 53,497                    | 1,335,673          |
| 4                | 122                          | 1928         | 1925                   | 62,474                    | 624,584            | 128                          | 2463         | 51,629                    | 557,472            |
| 5                | 122                          | 1608         | 1596                   | 74,398                    | 988,849            | 117                          | 2147         | 54,035                    | 842,189            |
| 6                | 120                          | 1909         | 1906                   | 62,391                    | 1,601,814          | 130                          | 2358         | 54,736                    | 2,965,708          |
| 7                | 114                          | 1671         | 1667                   | 67,285                    | 3,404,489          | 109                          | 2029         | 53,585                    | 1,053,010          |
| 8                | 114                          | 1836         | 1830                   | 61,586                    | 650,324            | 98                           | 1870         | 52,317                    | 463,761            |
| 9                | 107                          | 1572         | 1566                   | 66,537                    | 932,818            | 101                          | 1931         | 52,223                    | 789,815            |
| 10               | 105                          | 1661         | 1658                   | 62,201                    | 3,259,342          | 95                           | 1676         | 56,177                    | 3,487,146          |
| 11               | 108                          | 1697         | 1689                   | 63,075                    | 799,678            | 67                           | 1103         | 60,675                    | 477,632            |
| 12               | 92                           | 1226         | 1225                   | 72,793                    | 4,498,320          | 87                           | 1546         | 55,684                    | 1,167,568          |
| 13               | 85                           | 1348         | 1344                   | 62,212                    | 1,958,406          | 90                           | 1556         | 57,146                    | 902,996            |
| 14               | 86                           | 1258         | 1251                   | 66,134                    | 3,618,794          | 70                           | 1054         | 65,289                    | 1,567,687          |
| 15               | 86                           | 1239         | 1236                   | 67,665                    | 1,072,079          | 91                           | 1530         | 58,755                    | 1,855,199          |
| 16               | 83                           | 1203         | 1199                   | 66,632                    | 2,397,240          | 78                           | 1416         | 54,472                    | 424,043            |
| 17               | 76                           | 1200         | 1196                   | 62,458                    | 839,722            | 79                           | 1296         | 60,573                    | 562,710            |
| 18               | 67                           | 966          | 962                    | 67,447                    | 1,106,253          | 73                           | 1287         | 55,902                    | 538,746            |
| 19               | 65                           | 1013         | 1011                   | 62,086                    | 544,787            | 65                           | 1137         | 57,037                    | 509,668            |
| 20               | 73                           | 1200         | 1194                   | 59,712                    | 559,097            | 56                           | 1015         | 54,770                    | 1,069,142          |
| 21               | 73                           | 1032         | 1027                   | 66,222                    | 502,239            | 56                           | 799          | 69,095                    | 2,422,034          |
| 22               | 62                           | 1004         | 1002                   | 60,808                    | 465,568            | 56                           | 988          | 55,743                    | 2,257,615          |
| 23               | 54                           | 793          | 792                    | 65,311                    | 1,145,617          | 67                           | 1015         | 65,377                    | 715,163            |
| 24               | 64                           | 964          | 963                    | 64,447                    | 577,231            | 45                           | 669          | 66,283                    | 343,630            |
| 25               | 44                           | 703          | 702                    | 60,893                    | 520,202            | 49                           | 903          | 53,262                    | 589,556            |
| 26               | 53                           | 802          | 800                    | 63,560                    | 760,661            | 51                           | 834          | 59,809                    | 1,691,855          |
| 27               | 46                           | 717          | 713                    | 63,229                    | 1,341,874          | -                            | -            | -                         | -                  |
| 28               | 47                           | 700          | 696                    | 66,084                    | 2,145,618          | -                            | -            | -                         | -                  |
| 29               | 53                           | 791          | 789                    | 63,724                    | 901,776            | -                            | -            | -                         | -                  |
| <b>Total</b>     | <b>2540</b>                  | <b>38610</b> | <b>38494</b>           |                           |                    | <b>2665</b>                  | <b>47502</b> |                           |                    |
| <b>(Average)</b> |                              |              |                        | <b>(64,531)</b>           | <b>(1,438,031)</b> |                              |              | <b>(51,268)</b>           | <b>(1,052,279)</b> |

<sup>a</sup> Chromosomal length according to UMD3.1 Bovine genome assembly and OAR-V1 Ovine genome assembly respectively

<sup>b</sup> Number of SNPs with their known Ancestral and Derived alleles (cattle only)

<sup>c</sup> Average and maximum distance between consecutive SNPs on each autosome
