# Supplementary material for: Composite selection signals can localize the trait specific genomic regions in multi-breed populations of cattle and sheep
Source: PubMed Central journal article supplement (PMC4101850; doi:10.1186/1471-2156-15-34), 2014-03-17
Supplement: 1471-2156-15-34-S10.pdf [file 1471-2156-15-34-S10.pdf]

**Table S4. Complete list of genomic regions and genes harbouring significant SNPs identified by four tests in four cohorts of cattle and sheep data.** Cluster of minimum three significant SNPs within a window spanning 1 Mb genomic locations centred on a core SNP above the threshold (top 0.1%) in multiple tests (smoothed statistics) are reported and are compared with each other.

| Region <sup>a</sup> | Chr | Position <sup>b</sup><br>(Mb) | Total SNPs <sup>c</sup><br>within the<br>region | Number of Significant SNPs in clusters<br>(Boundaries of the cluster in Mb) |                             |                             |                             | Genes within the genomic regions <sup>d</sup> , known genes <sup>e</sup> are bold |                                                                                                                                                                                                     |
|---------------------|-----|-------------------------------|-------------------------------------------------|-----------------------------------------------------------------------------|-----------------------------|-----------------------------|-----------------------------|-----------------------------------------------------------------------------------|-----------------------------------------------------------------------------------------------------------------------------------------------------------------------------------------------------|
|                     |     |                               |                                                 | CSS                                                                         | XPEHH                       | F <sub>ST</sub>             | ΔDAF                        | N                                                                                 | Genes                                                                                                                                                                                               |
| A1                  | 1   | 1.01-2.63                     | 14                                              | <b>10*</b><br>(1.51-2.13)                                                   | <b>9</b><br>(1.51-1.90)     | <b>1</b><br>(1.63)          | -                           | 15                                                                                | CRYZL1, DONSON, SON, GART, TMEM50B, IFNAR1, IL10RB, IFNAR2, <b>OLIG1, C1H21orf62, GCFC1, SYNJ1</b> , C1H21orf59, C1H21orf63, URB1                                                                   |
| A2                  | 1   | 150.40-151.50                 | 4                                               | -                                                                           | -                           | <b>4</b><br>(150.90-151.00) | -                           | 4                                                                                 | PIGP, TTC3, DSCR3, DYRK1A                                                                                                                                                                           |
| A3                  | 4   | 64.05-65.22                   | 3                                               | -                                                                           | -                           | -                           | <b>3</b><br>(64.55-64.72)   | 7                                                                                 | BMPER, MIR1814C, BBS9, NT5C3, FKBP9, KBTBD2, LSM5                                                                                                                                                   |
| A4                  | 4   | 69.45-71.59                   | 22                                              | -                                                                           | -                           | <b>22</b><br>(69.95-71.09)  | -                           | 10                                                                                | SKAP2, SNX10, CBX3, HNRNPA2B1, NFE2L3, MIR148A, NPVF, CYCS, OSBPL3, DFNA5                                                                                                                           |
| A5                  | 13  | 63.90-65.97                   | 23                                              | <b>18</b><br>(64.40-65.47)                                                  | <b>23*</b><br>(64.66-65.86) | <b>1</b><br>(64.40)         | <b>5</b><br>(63.91-64.40)   | 26                                                                                | RALY, EIF2S2, <b>ASIP</b> , AHCY, ITCH, DYNLRB1, MAP1LC3A, GGT7, ACS2, GSS, MIR499, TRPC4AP, EDEM2, PROCR, EIF6, <b>UQCC, GDF5</b> , ERGIC3, SPAG4, CPNE1, RBM12, NFS1, ROMO1, RBM39, PHF20, SCAND1 |
| A6                  | 14  | 17.91-19.10                   | 5                                               | -                                                                           | -                           | -                           | <b>5</b><br>(18.41-18.60)   | 8                                                                                 | FBXO32, WDYHV1, ATAD2, ZHX1, C14H8orf76, WDR67, DERL1, ZHX2                                                                                                                                         |
| A7                  | 14  | 23.78-25.61                   | 11                                              | <b>11</b><br>(24.28-25.11)                                                  | <b>7</b><br>(24.79-25.35)   | <b>5*</b><br>(24.52-24.79)  | <b>10*</b><br>(24.28-24.79) | 12                                                                                | SOX17, RP1, TMEM68, TGS1, LYN, RPS20, <b>PLAG1, CHCHD7</b> , SDR16C5, SDR16C6, PENK, IMPAD1                                                                                                         |
| A8                  | 19  | 10.40-12.23                   | 4                                               | -                                                                           | -                           | <b>1</b><br>(11.44)         | <b>4</b><br>(10.90-11.73)   | 12                                                                                | GDPD1, YPEL2, DHX40, CLTC, PTRH2, VMP1, MIR21, TUBD1, RPS6KB1, RNFT1, TBX4, TBX2                                                                                                                    |
| A9                  | 25  | 42.27-43.35                   | 3                                               | -                                                                           | -                           | <b>3</b><br>(42.77-42.85)   | -                           | 9                                                                                 | GPR146, MIR2389, MIR339, COX19, ADAP1, GET4, GET4, PRKAR1B, PDGFA                                                                                                                                   |
| B1                  | 2   | 6.15-7.82                     | 11                                              | <b>10*</b><br>(6.65-7.32)                                                   | <b>11*</b><br>(6.18-7.32)   | <b>3</b><br>(6.70-6.79)     | -                           | 9                                                                                 | <b>MSTN</b> , PMS1, ORMDL1, OSGEPL1, ASNSD1, SLC40A1, WDR75, MIR2917, COL3A1                                                                                                                        |
| B2                  | 6   | 66.55-68.11                   | 11                                              | <b>11</b><br>(67.05-67.61)                                                  | <b>8</b><br>(67.11-67.42)   | -                           | -                           | 6                                                                                 | GABRA2, <b>COX7B2</b> , GABRA4, LOC536190, GABRB1, ATP10D, <b>FRYL<sup>f</sup></b>                                                                                                                  |

| Region <sup>a</sup> | Chr | Position <sup>b</sup><br>(Mb) | Total SNPs <sup>c</sup><br>within the<br>region | Number of Significant SNPs in clusters<br>(Boundaries of the cluster in Mb) |                                   |                                    |                                    | Genes within the genomic regions <sup>d</sup> , known genes <sup>e</sup> are bold |                                                                                                                                                                                                                                                     |
|---------------------|-----|-------------------------------|-------------------------------------------------|-----------------------------------------------------------------------------|-----------------------------------|------------------------------------|------------------------------------|-----------------------------------------------------------------------------------|-----------------------------------------------------------------------------------------------------------------------------------------------------------------------------------------------------------------------------------------------------|
|                     |     |                               |                                                 | CSS                                                                         | XPEHH                             | F <sub>ST</sub>                    | ΔDAF                               | N                                                                                 | Genes                                                                                                                                                                                                                                               |
| B3                  | 10  | 64.61-65.91                   | 5                                               | -                                                                           | -                                 | -                                  | <b>5</b><br><b>(65.11-65.41)</b>   | 12                                                                                | SQRDL, PLDN, C10H15orf48, MIR147, SPATA5L1, GATM, MIR2291, DUOX1, DUOXA1, SORD, FERMT2, DDHD1                                                                                                                                                       |
| B4                  | 11  | 48.00-49.30                   | 3                                               | -                                                                           | -                                 | -                                  | <b>3</b><br><b>(48.50-48.80)</b>   | 22                                                                                | RMND5A, RNF103, CHMP3, KDM3A, REEP1, MRPL35, IMMT, PTCD3, POLR1A, ST3GAL5, ATOH8, GNLY, LOC616323, SFTPB, USP39, C11H2orf68, TMEM150A, RNF181, VAMP5, VAMP8, GGCX, MAT2A                                                                            |
| B5                  | 14  | 26.19-28.60                   | 25                                              | -                                                                           | -                                 | <b>25*</b><br><b>(26.69-28.10)</b> | -                                  | 7                                                                                 | UBXN2B, CYP7A1, SDCBP, TOX, CA8, RAB2A, CLVS1                                                                                                                                                                                                       |
| B6                  | 16  | 44.49-46.05                   | 11                                              | <b>11</b><br><b>(44.99-45.55)</b>                                           | <b>11</b><br><b>(44.99-45.55)</b> | <b>1</b><br><b>(45.55)</b>         | -                                  | 12                                                                                | <b>NMNAT1</b> , CTNNBIP1, PIK3CD, TMEM201, <b>SLC25A33</b> , SPSB1, MIR34A, <b>SLC2A5</b> , CA6, ENO1, <b>SLC45A1</b> , LOC786597                                                                                                                   |
| B7                  | 17  | 49.08-50.24                   | 3                                               | -                                                                           | -                                 | -                                  | <b>3</b><br><b>(49.58-49.74)</b>   | 2                                                                                 | GLT1D1, SLC15A4                                                                                                                                                                                                                                     |
| B8                  | 18  | 13.34-15.03                   | 12                                              | <b>5</b><br><b>(13.84-14.53)</b>                                            | <b>3</b><br><b>(14.36-14.53)</b>  | <b>1</b><br><b>(13.86)</b>         | -                                  | 33                                                                                | SLC7A5, CA5A, BANP, CYBA, MVD, SNAI3, RNF166, CTU2, MIR2327, APRT, GALNS, TRAPPC2L, ACSF3, CDH15, SLC22A31, SPG7, RPL13, CPNE7, DPEP1, CHMP1A, CDK10, SPATA2L, FANCA, SPIRE2, SPIRE2, TCF25, <b>MC1R</b> , TUBB3, DEF8, DBNDD1, GAS8, SHCBP1, VPS35 |
| B9                  | 20  | 30.65-31.80                   | 3                                               | -                                                                           | -                                 | -                                  | <b>3</b><br><b>(31.15-31.30)</b>   | 12                                                                                | FGF10, NNT, PAIP1, C20H5orf34, C20H5orf28, CCL28, HMGCS1, TRH, NIM1, ZNF131, ZNF131, SEPP1                                                                                                                                                          |
| B10                 | 21  | 46.23-47.38                   | 3                                               | -                                                                           | -                                 | -                                  | <b>3</b><br><b>(46.73-46.88)</b>   |                                                                                   | BRMS1L, MBIP, NKX2-1, NKX2-8, PAX9, SLC25A21                                                                                                                                                                                                        |
| B11                 | 22  | 46.16-47.40                   | 6                                               | -                                                                           | <b>6</b><br><b>(46.66-46.90)</b>  | -                                  | -                                  | 1                                                                                 | CACNA2D3                                                                                                                                                                                                                                            |
| B12                 | 26  | 19.11-20.51                   | 7                                               | -                                                                           | -                                 | -                                  | <b>7</b><br><b>(19.61-20.01)</b>   |                                                                                   | LOXL4, LOXL4, PYROXD2, MIR1287, HPS1, CNM1, GOT1, NKX2-3, SLC25A28                                                                                                                                                                                  |
| C1                  | 1   | 202.19-203.86                 | 3                                               | -                                                                           | -                                 | -                                  | <b>3</b><br><b>(202.69-203.36)</b> | 14                                                                                | ITGB5, HEG1, SLC12A8, ZNF148, SNX4, OSBP11, IQCG, LRCH3, FYT1D1, KIAA0226, MUC4, TNK2, TFRC, ZDHHC19                                                                                                                                                |

| Region <sup>a</sup> | Chr | Position <sup>b</sup><br>(Mb) | Total SNPs <sup>c</sup><br>within the<br>region | Number of Significant SNPs in clusters<br>(Boundaries of the cluster in Mb) |                                    |                                    |                                    | Genes within the genomic regions <sup>d</sup> , known genes <sup>e</sup> are bold |                                                                                                                                                                                                                                                                                                                                                                                                                                               |
|---------------------|-----|-------------------------------|-------------------------------------------------|-----------------------------------------------------------------------------|------------------------------------|------------------------------------|------------------------------------|-----------------------------------------------------------------------------------|-----------------------------------------------------------------------------------------------------------------------------------------------------------------------------------------------------------------------------------------------------------------------------------------------------------------------------------------------------------------------------------------------------------------------------------------------|
|                     |     |                               |                                                 | CSS                                                                         | XPEHH                              | F <sub>ST</sub>                    | ΔDAF                               | N                                                                                 | Genes                                                                                                                                                                                                                                                                                                                                                                                                                                         |
| C2                  | 3   | 172.57-174.00                 | 6                                               | -                                                                           | -                                  | -                                  | <b>6</b><br><b>(173.07-173.50)</b> | 49                                                                                | XRCC6BP1, LOC100134274, CTDSP2, LOC645534, LOC645561, AVIL, TSFM, FAM119B, METTL1, CYP27B1, LOC100289240, LOC100289817, LOC100292982, CDK4, TSPAN31, AGAP2, LOC100130776, OS9, SVIP, B4GALNT1, LOC100293005, LOC100289202, LOC100289780, SLC26A10, GEFT, DTX3, PIP4K2C, KIF5A, DCTN2, MBD6, DDIT3, MARS, ARHGAP9, GLI1, INHBE, INHBC, R3HDM2, NXPH4, LRP1, STAT6, NAB2, TMEM194A, ZBTB39, GPR182, HSD17B6, PRIM1, NACA, NACA2, NACAP1, PTGES3 |
| C3                  | 4   | 50.52-51.85                   | 6                                               | -                                                                           | -                                  | -                                  | <b>6</b><br><b>(51.02-51.35)</b>   | 16                                                                                | FLJ36031, PIK3CG, PRKAR2B, HBP1, COG5, GPR22, DUS4L, BCAP29, LOC286002, SLC26A4, LOC100128737, CBLL1, ZNF645, SLC26A3, DLD, LAMB1                                                                                                                                                                                                                                                                                                             |
| C4                  | 10  | 24.84-27.59                   | 5                                               | -                                                                           | -                                  | <b>5</b><br><b>(25.34-27.09)</b>   | -                                  | 18                                                                                | FAM48B1, FAM48B2, LOC100294444, EXOSC8, ALG5, SMAD9, RFXAP, C13orf36, CCNA1, SPG20, SOHLH2, LSM3, LOC647302, DCLK1, NBEA, MAB21L1, BCL8, C2orf27A                                                                                                                                                                                                                                                                                             |
| C5                  | 10  | 28.54-30.05                   | 34                                              | <b>26*</b><br><b>(29.04-30.00)</b>                                          | <b>17*</b><br><b>(29.04-29.55)</b> | <b>34*</b><br><b>(29.04-30.27)</b> | <b>5*</b><br><b>(29.14-29.74)</b>  | 9                                                                                 | PDS5B, MDH1, N4BP2L2, N4BP2L1, ZAR1L, FRY, EEF1DP3, <b>RXFP2</b> , B3GALTL                                                                                                                                                                                                                                                                                                                                                                    |
| C6                  | 10  | 38.86-40.90                   | 21                                              | -                                                                           | <b>21</b><br><b>(39.36-40.40)</b>  | -                                  | -                                  | 2                                                                                 | LMLN, PCDH9                                                                                                                                                                                                                                                                                                                                                                                                                                   |
| C7                  | 12  | 5.41-6.88                     | 6                                               | -                                                                           | -                                  | -                                  | <b>6</b><br><b>(5.91-6.38)</b>     | 1                                                                                 | KCNT2                                                                                                                                                                                                                                                                                                                                                                                                                                         |
| C8                  | 13  | 66.97-68.50                   | 9                                               | <b>7</b><br><b>(67.47-68.00)</b>                                            | -                                  | <b>7</b><br><b>(67.47-68.00)</b>   | <b>3</b><br><b>(67.86-67.95)</b>   | 17                                                                                | C20orf186, C20orf71, PLUNC, CDK5RAP1, SNTA1, CBFA2T2, NECAB3, E2F1, PXMP4, ZNF341, CHMP4B, RALY, EIF2S2, <b>ASIP</b> , AHCY, TOMM20, LOC100129272, ITCH                                                                                                                                                                                                                                                                                       |
| C9                  | 16  | 56.98-58.13                   | 5                                               | -                                                                           | -                                  | -                                  | <b>5</b><br><b>(57.48-57.63)</b>   | 0                                                                                 | -                                                                                                                                                                                                                                                                                                                                                                                                                                             |

| Region <sup>a</sup> | Chr | Position <sup>b</sup><br>(Mb) | Total SNPs <sup>c</sup><br>within the<br>region | Number of Significant SNPs in clusters<br>(Boundaries of the cluster in Mb) |                                   |                              |                              | Genes within the genomic regions <sup>d</sup> , known genes <sup>e</sup> are bold |                                                                                                                                                                                                                                                                                                                                                                                                                                                     |
|---------------------|-----|-------------------------------|-------------------------------------------------|-----------------------------------------------------------------------------|-----------------------------------|------------------------------|------------------------------|-----------------------------------------------------------------------------------|-----------------------------------------------------------------------------------------------------------------------------------------------------------------------------------------------------------------------------------------------------------------------------------------------------------------------------------------------------------------------------------------------------------------------------------------------------|
|                     |     |                               |                                                 | CSS                                                                         | XPEHH                             | F <sub>ST</sub>              | ΔDAF                         | N                                                                                 | Genes                                                                                                                                                                                                                                                                                                                                                                                                                                               |
| C10                 | 25  | 6.67-8.29                     | 15                                              | <b>14</b><br>(7.17-7.79)                                                    | <b>10</b><br>(7.17-7.65)          | -                            | <b>2</b><br>(7.17-7.20)      | 16                                                                                | SLC35F3, C1orf31, TARBP1, IRF2BP2, LOC100290173, LOC100131463, SNORA14A, SNORA14B, RBM34, ARID4B, GGPS1, TBCE, B3GALNT2, LYST, NID1, <b>LRP4<sup>f</sup></b>                                                                                                                                                                                                                                                                                        |
| D1                  | 2   | 118.48-120.10                 | 15                                              | -                                                                           | <b>15</b><br>(118.98-119.60)      | -                            | -                            | 13                                                                                | CLCN3, LOC100288206, LOC100290958, LOC100291623, NEK1, CBR4, PALLD, FLJ45445, LOC100132062, LOC100132287, ANXA10, HIATL1, LOC100130353                                                                                                                                                                                                                                                                                                              |
| D2                  | 2   | 119.62-122.30                 | 23                                              | <b>20</b><br>(120.12-121.80)                                                | <b>11*</b><br>(121.06-121.80)     | <b>10</b><br>(120.12-120.90) | <b>16</b><br>(120.12-121.80) | 26                                                                                | ANXA10, HIATL1, LOC100130353, LGSN, OCA2, HERC2, LOC100290629, LOC390561, HERC2P2, HERC2P4, LOC728278, LOC646139, LOC100132101, LOC100289574, LOC100293165, LOC100294446, NIPA1, NIPA2, POLR2K, CYFIP1, TUBGCP5, IMP4, LOC644037, LOC645691, LOC100291878, PLEKHB2                                                                                                                                                                                  |
| D3                  | 2   | 122.89-124.60                 | 17                                              | -                                                                           | <b>17</b><br><b>123.39-124.10</b> | -                            | -                            | 15                                                                                | HS6ST1, LOC100293267, LOC100289081, UGGT1, SAP130, LOC439994, LOC642361, LOC100288164, LOC100293494, LOC642361, LOC100288907, LOC100291465, LOC728190, AMMECR1L, POLR2D                                                                                                                                                                                                                                                                             |
| D4                  | 2   | 124.25-128.05                 | 54                                              | <b>28*</b><br>(124.75-127.55)                                               | <b>5</b><br>(125.97-126.31)       | <b>27</b><br>(124.69-127.58) | <b>27</b><br>(124.69-127.61) | 47                                                                                | UGGT1, SAP130, LOC439994, LOC642361, LOC100288164, LOC100293494, LOC642361, LOC100288907, LOC100291465, LOC728190, AMMECR1L, POLR2D, WDR33, LOC100288089, LOC100293529, LIMS2, GPR17, LIMS2, MYO7B, IWS1, PROC, MAP3K2, ERCC3, CYP27C1, BIN1, LOC100294448, NAB1, MFSD6, HIBCH, LOC100288000, LOC100290880, LOC100292514, C2orf88, <b>MSTN</b> , PMS1, ORMDL1, OSGEPL1, ANKAR, ASNSD1, SLC40A1, WDR75, COL5A2, COL3A1, PLGLA, PLGLB1, PLGLB2, GULP1 |
| D5                  | 5   | 63.23-64.63                   | 11                                              | -                                                                           | -                                 | <b>11</b><br>(63.73-64.13)   | <b>4</b><br>(63.73-64.13)    | 12                                                                                | ADRB2, ABLIM3, AFAP1L1, PCYOX1L, IL17B, CSNK1A1, CSNK1A1L, CSNK1A1P, FLJ41603, PPARGC1B, PDE6A, SLC26A2                                                                                                                                                                                                                                                                                                                                             |

- <sup>a</sup> Prefix (A, B, C and D) with each region number represents the data set as defined in Table 1 (main text). Extracted list of 12 genomic regions, their positions, number of significant SNPs (for each test) and number of genes within each genomic region is shown in Table 2.
- <sup>b</sup> Position of genomic regions includes a 0.5 Mb extension on both sides of boundaries of main cluster identified by CSS to compare constituent tests and count of genes. Large sized (> 1 Mb) regions are constituted by joining successive (<1 Mb apart) clusters.
- <sup>c</sup> Total number of SNPs located within the boundaries of the largest cluster identified by any of 4 tests and their position exclude 0.5 Mb additions for gene investigation (shown in <sup>b</sup>). Total number of SNPs located within the boundaries of the main cluster identified by CSS only is shown in Table 3 of main text.
- <sup>d</sup> Number (N) and list of genes mapped on bovine (UMD3.1) and ovine (OAR.v1) assemblies within the boundaries of genomic regions.
- <sup>e</sup> Candidate genes with known functional/structural effects for a particular trait present in the contrasting panels of multiple breeds.
- <sup>f</sup> Downstream genomic location (outside) of the listed gene from the region in Mb.
- \* Indicates the cluster of highest ranked SNPs (raw scores) for particular selection test.
