# Supplementary material for: Composite selection signals can localize the trait specific genomic regions in multi-breed populations of cattle and sheep
Source: Springer Nature journal article supplement (doi:10.1186/1471-2156-15-34), 2014-01-01
Supplement: 12863_2013_1358_MOESM1_ESM.pdf [file 12863_2013_1358_MOESM1_ESM.pdf]

Additional file 1

**Table S1.** The information about the breeds, animals and phenotype categories of cattle sample

| <b>No</b> | <b>Cattle Breeds</b>    | <b>Country of origin (and sampling, if different)</b> | <b>Phenotype Categories</b> | <b>Body size</b> | <b>Geographic Categories</b> | <b>Sample Size</b> |
|-----------|-------------------------|-------------------------------------------------------|-----------------------------|------------------|------------------------------|--------------------|
| 1         | Angus                   | Britain (USA and NZ)                                  | Poll, Normal muscle         | Small            | Europe                       | 44                 |
| 2         | Red Angus               | Britain (USA)                                         | Poll, Normal muscle         | Small            | Europe                       | 15                 |
| 3         | Red Poll                | Britain (USA)                                         | Poll                        | Small            | Europe                       | 5                  |
| 4         | Belted Galloway         | Britain                                               | Poll                        | Medium           | Europe                       | 4                  |
| 5         | Galloway                | Britain                                               | Poll                        | Medium           | Europe                       | 4                  |
| 6         | Murray Grey             | Australia (USA)                                       | Poll                        | Medium           | -                            | 5                  |
| 7         | Romosinuano             | New World Spanish                                     | Poll, Normal muscle         | Small            | -                            | 8                  |
| 8         | Hereford                | Britain (USA, NZ)                                     | Normal muscle               | Medium           | Europe                       | 31                 |
| 9         | Limousin                | France (USA)                                          | Normal muscle               | Medium           | Europe                       | 35                 |
| 10        | Charolais               | France (Britain, USA)                                 | Normal muscle               | Large            | Europe                       | 55                 |
| 11        | Lincoln Red             | Britain (USA)                                         | Normal muscle               | Large            | Europe                       | 9                  |
| 12        | Simmental               | Switzerland (USA)                                     | Normal muscle               | Large            | Europe                       | 10                 |
| 13        | Scottish Highland       | Britain (and USA)                                     | Horn, Normal muscle         | Small            | Europe                       | 9                  |
| 14        | Texas Longhorn          | New World Spanish                                     | Horn, Normal muscle         | Medium           | -                            | 10                 |
| 15        | Baoule                  | Burkina Faso                                          | Horn, Normal muscle         | Medium           | Africa                       | 29                 |
| 16        | Chianina                | Italy (USA)                                           | Horn, Normal muscle         | Large            | Europe                       | 8                  |
| 17        | Maine Anjou             | France (and USA)                                      | Horn, Normal muscle         | Large            | Europe                       | 21                 |
| 18        | Romagnola               | Italy                                                 | Horn, Normal muscle         | Large            | Europe                       | 24                 |
| 19        | Piedmontese             | Italy                                                 | Horn, Double muscle         | Medium           | Europe                       | 26                 |
| 20        | Parthenais (Maraichine) | France                                                | Double muscle               | Large            | Europe                       | 19                 |
| 21        | Belgian Blue            | Belgium (USA)                                         | Double muscle               | Large            | Europe                       | 4                  |
| 22        | Borgou                  | Benin                                                 | -                           | -                | Africa                       | 30                 |
| 23        | Lagune                  | Benin                                                 | -                           | -                | Africa                       | 30                 |
| 24        | NDama                   | West Africa (Burkina Faso, Guinea and Gambia)         | -                           | -                | Africa                       | 61                 |
| 25        | Oulmès Zaer             | Morocco                                               | -                           | -                | Africa                       | 26                 |
| 26        | Sheko                   | East Africa (Ethiopia)                                | -                           | -                | Africa                       | 20                 |
| 27        | Somba                   | Togo                                                  | -                           | -                | Africa                       | 30                 |
| 28        | Abondance               | France                                                | -                           | -                | Europe                       | 22                 |
| 29        | Aubrac                  | France                                                | -                           | -                | Europe                       | 22                 |
| 30        | Blonde d'Aquitaine      | France (USA)                                          | -                           | -                | Europe                       | 5                  |
| 31        | Bretonne Black Pied     | France                                                | -                           | -                | Europe                       | 18                 |
| 32        | Brown Swiss             | Switzerland (USA)                                     | -                           | -                | Europe                       | 41                 |
| 33        | Devon                   | Britain                                               | -                           | -                | Europe                       | 4                  |
| 34        | Dexter                  | Ireland (Britain)                                     | -                           | -                | Europe                       | 4                  |

Additional file 1

| <b>No</b> | <b>Cattle Breeds</b>    | <b>Country of origin (and sampling, if different)</b> | <b>Phenotype Categories</b> | <b>Body size</b> | <b>Geographic Categories</b> | <b>Sample Size</b> |
|-----------|-------------------------|-------------------------------------------------------|-----------------------------|------------------|------------------------------|--------------------|
| 35        | Finnish Ayrshire        | Finland                                               | -                           | -                | Europe                       | 10                 |
| 36        | French Red Pied Lowland | France                                                | -                           | -                | Europe                       | 22                 |
| 37        | Gascon                  | France                                                | -                           | -                | Europe                       | 22                 |
| 38        | Gelbvieh                | Germany (USA)                                         | -                           | -                | Europe                       | 8                  |
| 39        | Guernsey                | Channel Islands (UK, USA)                             | -                           | -                | Europe                       | 21                 |
| 40        | Holstein                | Netherlands (France, NZ and USA)                      | -                           | -                | Europe                       | 80                 |
| 41        | Jersey                  | Channel Islands (France, USA and NZ)                  | -                           | -                | Europe                       | 49                 |
| 42        | Kerry                   | Ireland (Britain)                                     | -                           | -                | Europe                       | 3                  |
| 43        | Longhorn                | Britain                                               | -                           | -                | Europe                       | 3                  |
| 44        | Marchigiana             | Italy (USA)                                           | -                           | -                | Europe                       | 5                  |
| 45        | Montbeliarde            | France                                                | -                           | -                | Europe                       | 35                 |
| 46        | Normande                | France                                                | -                           | -                | Europe                       | 31                 |
| 47        | Norwegian Red           | Norway                                                | -                           | -                | Europe                       | 21                 |
| 48        | Pinzgauer               | Austria (USA)                                         | -                           | -                | Europe                       | 5                  |
| 49        | Salers                  | France (and USA)                                      | -                           | -                | Europe                       | 27                 |
| 50        | Shorthorn               | Britain (USA)                                         | -                           | -                | Europe                       | 10                 |
| 51        | South Devon             | Britain                                               | -                           | -                | Europe                       | 4                  |
| 52        | Sussex                  | Britain                                               | -                           | -                | Europe                       | 4                  |
| 53        | Tarine Tarentaise       | France (and USA)                                      | -                           | -                | Europe                       | 23                 |
| 54        | Vosgienne Vosges        | France                                                | -                           | -                | Europe                       | 19                 |
| 55        | Welsh Black             | Britain                                               | -                           | -                | Europe                       | 2                  |
| 56        | White Park              | Britain                                               | -                           | -                | Europe                       | 4                  |

**NZ:** New Zealand, **UK:** United Kingdom (Britain), **USA:** United States of America
