# Supplementary material for: Composite selection signals can localize the trait specific genomic regions in multi-breed populations of cattle and sheep
Source: Springer Nature journal article supplement (doi:10.1186/1471-2156-15-34), 2014-01-01
Supplement: 12863_2013_1358_MOESM2_ESM.pdf [file 12863_2013_1358_MOESM2_ESM.pdf]

Additional file 2

**Table S2.** The information about the breeds, animals and phenotype categories of sheep samples

| <b>No.</b> | <b>Sheep Breeds</b>        | <b>Phenotype Categories</b> | <b>Sample Size</b> |
|------------|----------------------------|-----------------------------|--------------------|
| 1          | Afec Assaf                 | Poll, Normal muscle         | 24                 |
| 2          | African Dorper             | Poll, Normal muscle         | 20                 |
| 3          | African White Dorper       | Poll, Normal muscle         | 6                  |
| 4          | Afshari                    | Poll, Normal muscle         | 37                 |
| 5          | Altamura                   | Horn, Normal muscle         | 24                 |
| 6          | Arawapa                    | Horn, Normal muscle         | 37                 |
| 7          | Australian Coopworth       | Poll, Normal muscle         | 19                 |
| 8          | Australian Industry Merino | Horn, Normal muscle         | 86                 |
| 9          | Australian Merino          | Horn, Normal muscle         | 50                 |
| 10         | Australian Poll Dorset     | Poll, Normal muscle         | 105                |
| 11         | Australian Poll Merino     | Poll, Normal muscle         | 98                 |
| 12         | Australian Suffolk         | Poll, Normal muscle         | 108                |
| 13         | Bangladeshi BGE            | Horn, Normal muscle         | 24                 |
| 14         | Bangladeshi Garole         | Horn, Normal muscle         | 24                 |
| 15         | Barbados Black Belly       | Poll, Normal muscle         | 24                 |
| 16         | Border Leicester           | Poll, Normal muscle         | 47                 |
| 17         | Boreray                    | Horn, Normal muscle         | 17                 |
| 18         | Brazilian Creole           | Horn, Normal muscle         | 23                 |
| 19         | Castellana                 | Horn, Normal muscle         | 23                 |
| 20         | Changthangi                | Horn, Normal muscle         | 29                 |
| 21         | Churra                     | Horn, Normal muscle         | 119                |
| 22         | Comisana                   | Poll, Normal muscle         | 24                 |
| 23         | Cyprus Fat Tail            | Horn, Normal muscle         | 30                 |
| 24         | Deccani                    | Poll, Normal muscle         | 23                 |
| 25         | Dorset Horn                | Horn, Normal muscle         | 21                 |
| 26         | East Friesian Brown        | Poll, Normal muscle         | 39                 |
| 27         | East Friesian White        | Poll, Normal muscle         | 9                  |
| 28         | Egyptian Barki             | Horn, Normal muscle         | 13                 |
| 29         | Engadine Red Sheep         | Poll, Normal muscle         | 24                 |
| 30         | Ethiopian Menz             | Horn, Normal muscle         | 34                 |
| 31         | Finnsheep                  | Poll, Normal muscle         | 99                 |
| 32         | Galway                     | Poll, Normal muscle         | 49                 |
| 33         | Garut                      | Horn, Normal muscle         | 22                 |
| 34         | German Texel               | Poll, Double muscle         | 46                 |
| 35         | Gulf Coast Native          | Horn, Normal muscle         | 93                 |
| 36         | Icelandic                  | Horn, Normal muscle         | 16                 |
| 37         | Improved Awassi            | Poll, Normal muscle         | 23                 |

## Additional file 2

|    |                                 |                     |     |
|----|---------------------------------|---------------------|-----|
| 38 | Indian Garole                   | Horn, Normal muscle | 26  |
| 39 | Irish Suffolk                   | Poll, Normal muscle | 49  |
| 40 | Karakas                         | Poll, Normal muscle | 17  |
| 41 | Leccese                         | Horn, Normal muscle | 24  |
| 42 | Local Awassi                    | Horn, Normal muscle | 24  |
| 43 | Macarthur Merino                | Horn, Normal muscle | 10  |
| 44 | Meat Lacaune                    | Poll, Normal muscle | 78  |
| 45 | Merinolandschaf                 | Poll, Normal muscle | 24  |
| 46 | Milk Lacaune                    | Poll, Normal muscle | 103 |
| 47 | Moghani                         | Poll, Normal muscle | 34  |
| 48 | Morada Nova                     | Poll, Normal muscle | 22  |
| 49 | Namaqua Afrikaner               | Horn, Normal muscle | 12  |
| 50 | New Zealand Romney              | Poll, Normal muscle | 24  |
| 51 | New Zealand Texel               | Poll, Double muscle | 23  |
| 52 | Norduz                          | Horn, Normal muscle | 20  |
| 53 | Ojalada                         | Horn, Normal muscle | 24  |
| 54 | Old Norwegian spaelsau          | Horn, Normal muscle | 15  |
| 55 | Qezel                           | Poll, Normal muscle | 35  |
| 56 | Rambouillet                     | Horn, Normal muscle | 101 |
| 57 | Rasaaragonesa                   | Poll, Normal muscle | 22  |
| 58 | Red Maasai                      | Horn, Normal muscle | 44  |
| 59 | Ronderib Afrikaner              | Horn, Normal muscle | 17  |
| 60 | Sakiz                           | Horn, Normal muscle | 22  |
| 61 | Santalnes                       | Poll, Normal muscle | 47  |
| 62 | Sardinian Ancestral Black       | Horn, Normal muscle | 20  |
| 63 | Scottish Blackface              | Horn, Normal muscle | 56  |
| 64 | Scottish Texel                  | Poll, Double muscle | 80  |
| 65 | Soay                            | Horn, Normal muscle | 110 |
| 66 | Spael-coloured                  | Poll, Normal muscle | 3   |
| 67 | Spael-white                     | Poll, Normal muscle | 32  |
| 68 | Sumatra                         | Normal muscle       | 24  |
| 69 | SwissBlack-Brown Mountain Sheep | Poll, Normal muscle | 24  |
| 70 | Swiss Mirror Sheep              | Poll, Normal muscle | 24  |
| 71 | Swiss White Alpine Sheep        | Poll, Normal muscle | 24  |
| 72 | Tibetan                         | Horn, Normal muscle | 37  |
| 73 | Valais Red Sheep                | Horn, Normal muscle | 23  |
| 74 | Wiltshire                       | Horn, Normal muscle | 20  |
