# Supplementary material for: Composite selection signals can localize the trait specific genomic regions in multi-breed populations of cattle and sheep
Source: Springer Nature journal article supplement (doi:10.1186/1471-2156-15-34), 2014-01-01
Supplement: 12863_2013_1358_MOESM6_ESM.pdf [file 12863_2013_1358_MOESM6_ESM.pdf]

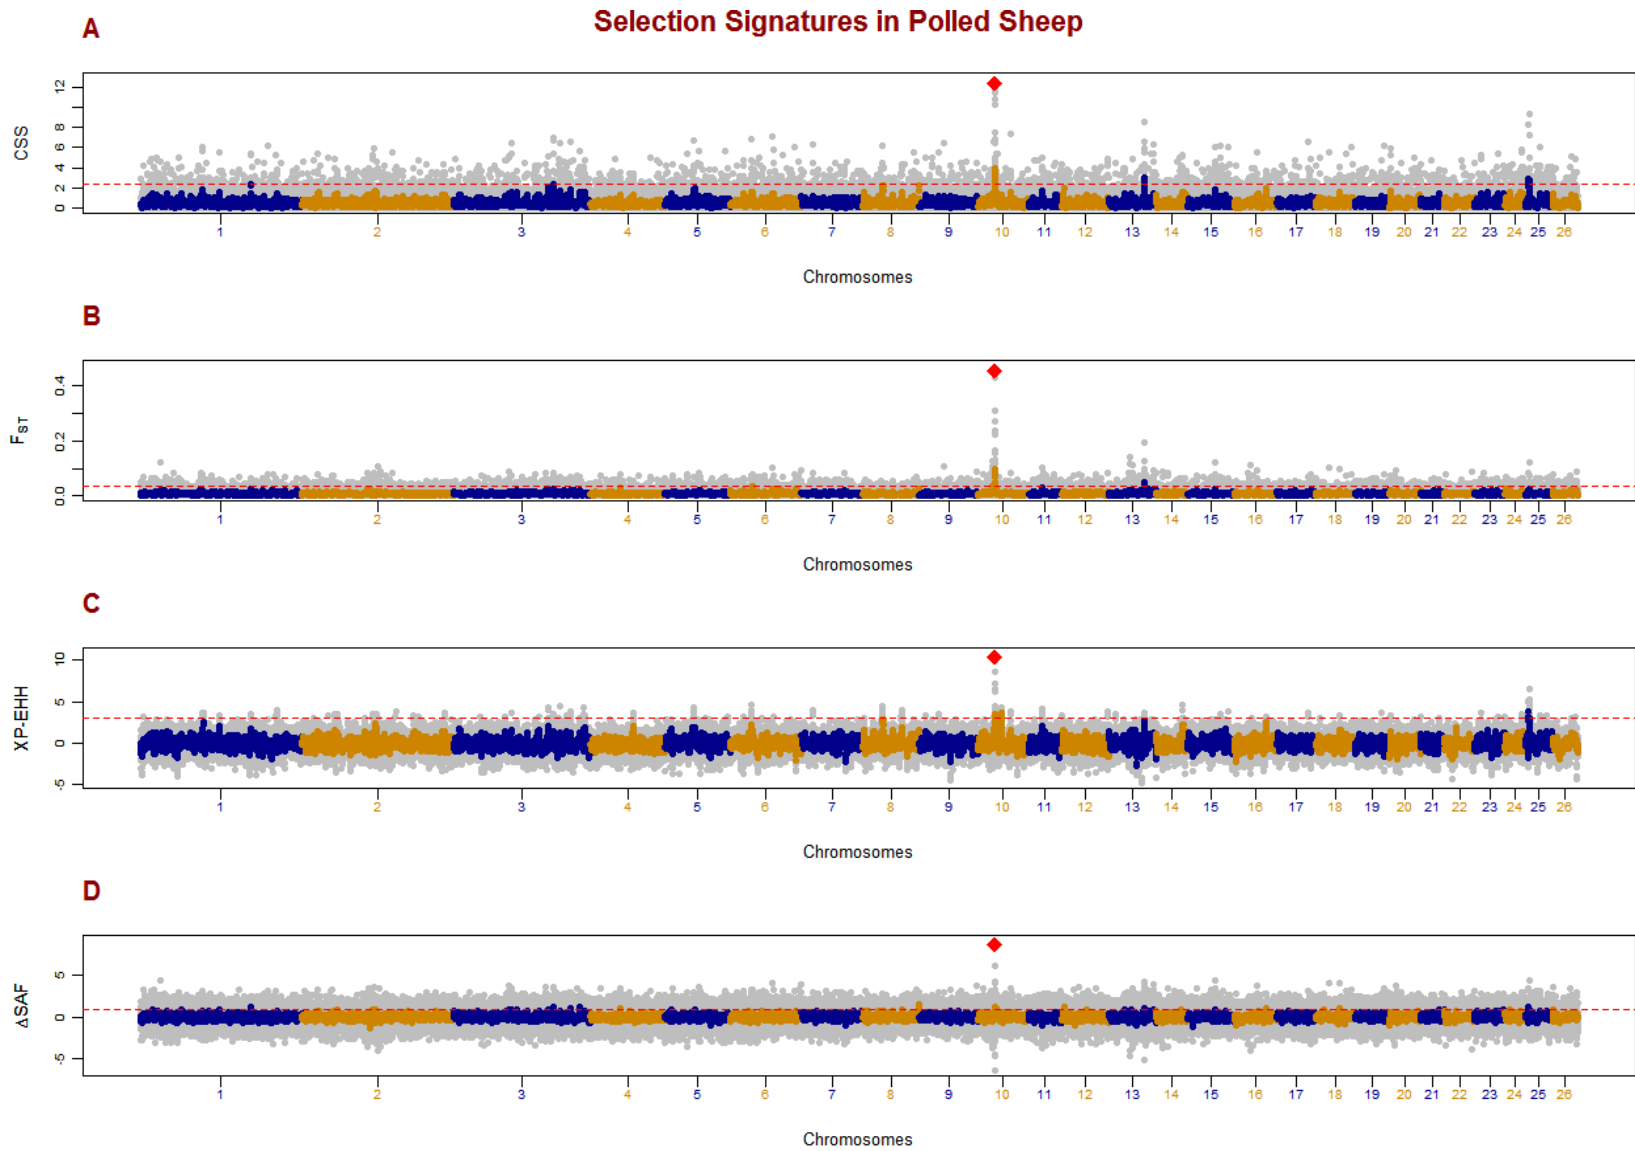

**Figure S3.** Manhattan plots of SNP-wise scores for each selection test statistics (A: CSS, B:  $F_{ST}$ , C: XP-EHH, D:  $\Delta SAF$ ) for polled sheep (dataset C). Gray dots in the background show raw scores and blue and orange dots in the foreground show smooth scores, averaged over SNPs within 1 Mb sliding windows. Red dotted lines indicate a threshold of top 0.1 percentile of the genome-wide smoothed scores for each of the selection test statistics. Red square dots in each plot show the genome-wide highest raw signals.
