# Supplementary material for: Composite selection signals can localize the trait specific genomic regions in multi-breed populations of cattle and sheep
Source: Springer Nature journal article supplement (doi:10.1186/1471-2156-15-34), 2014-01-01
Supplement: 12863_2013_1358_MOESM7_ESM.pdf [file 12863_2013_1358_MOESM7_ESM.pdf]

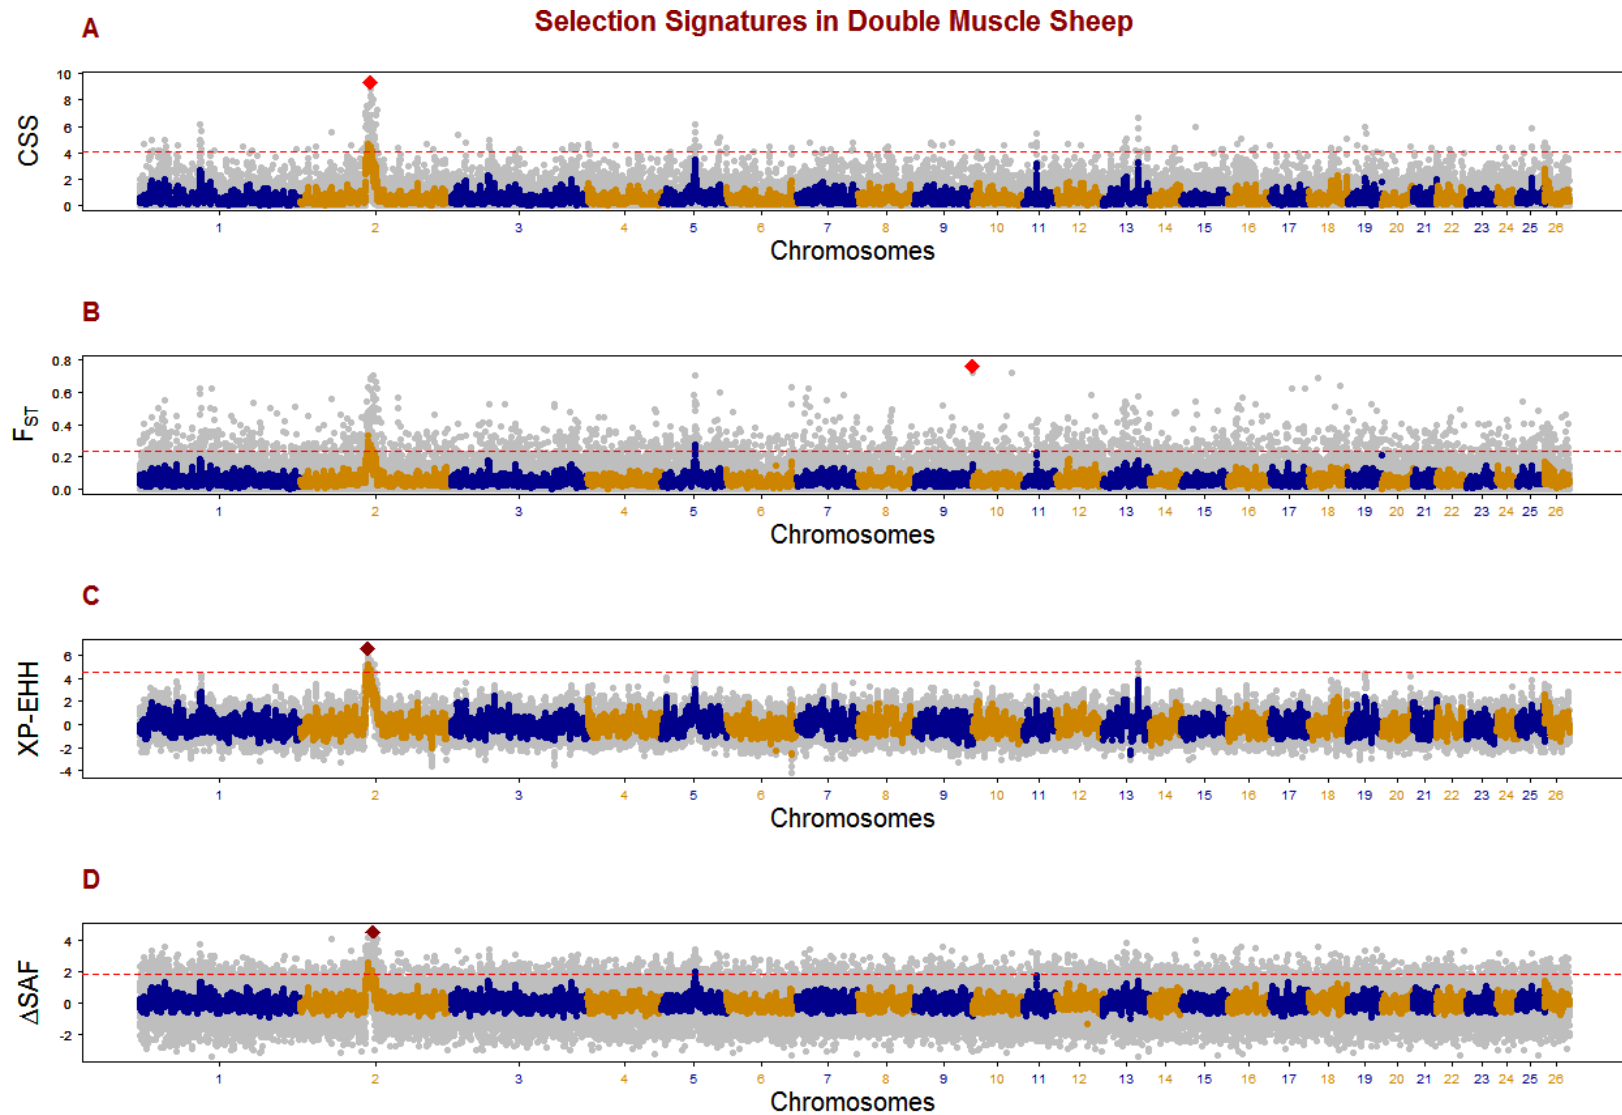

**Figure S4.** Manhattan plots of SNP-wise scores for each selection test statistics (A: CSS, B:  $F_{ST}$ , C: XP-EHH, D:  $\Delta SAF$ ) for double muscle sheep (dataset D). Gray dots in the background show raw scores and blue and orange dots in the foreground show smooth scores, averaged over SNPs within 1 Mb sliding windows. Red dotted lines indicate a threshold of top 0.1 percentile of the genome-wide smoothed scores for each of the selection test statistics. Red square dots in each plot show the genome-wide highest raw signals. The square dots are in dark brown colour in C and D plots where the highest XPEHH and  $\Delta SAF$  signals are more than 3 Mb upstream and downstream, respectively, from the known candidate region on chromosome 2.
