# Supplementary material for: Composite selection signals can localize the trait specific genomic regions in multi-breed populations of cattle and sheep
Source: Springer Nature journal article supplement (doi:10.1186/1471-2156-15-34), 2014-01-01
Supplement: 12863_2013_1358_MOESM8_ESM.pdf [file 12863_2013_1358_MOESM8_ESM.pdf]

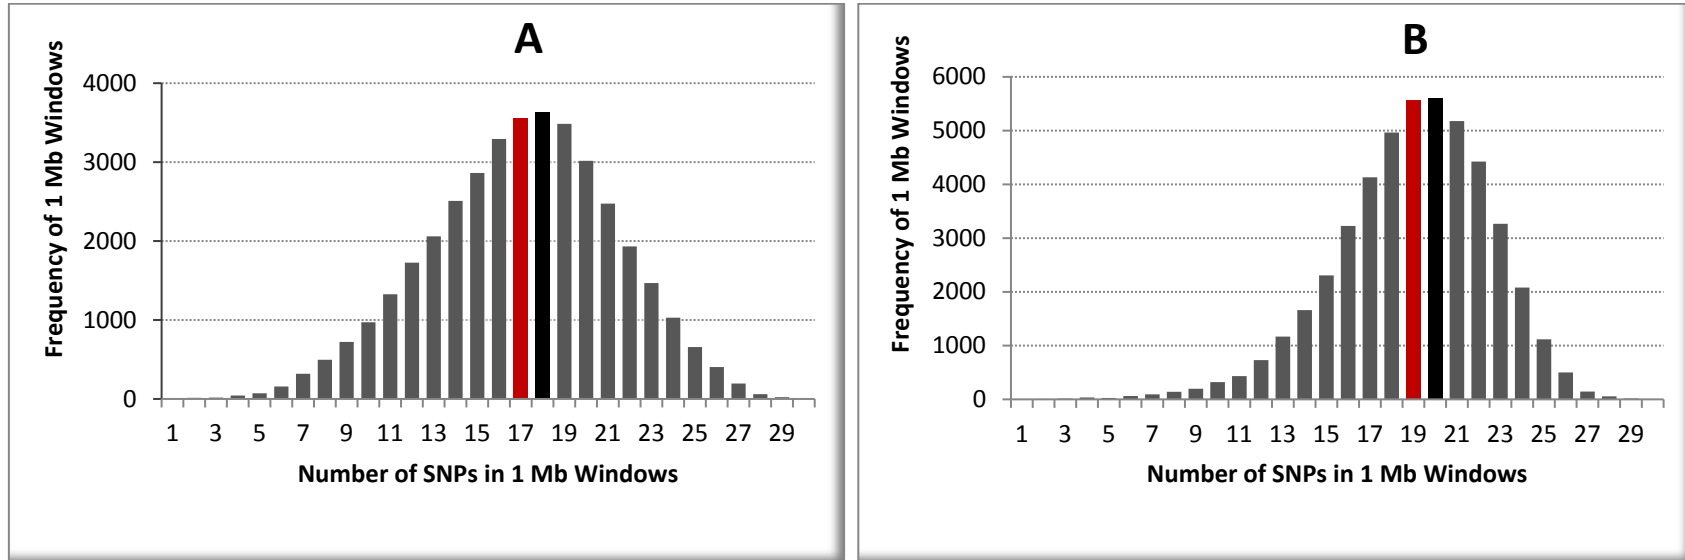

**Figure S5. Distribution of the number of SNPs in 1 Mb sliding windows in cattle (A) and sheep (B).** Bars in A and B indicate the frequency of sliding windows containing various number of SNPs out of the genome-wide distribution, i.e., 38,610 SNPs of cattle and 47,502 SNPs of sheep data, respectively (details in Table 1, S3). The bars in red (black) colours show the mean  $\approx$  median (mode) numbers as 17 (18) and 19 (20) of SNPs for cattle and sheep data, respectively.
