# Supplementary material for: Composite selection signals can localize the trait specific genomic regions in multi-breed populations of cattle and sheep
Source: Springer Nature journal article supplement (doi:10.1186/1471-2156-15-34), 2014-01-01
Supplement: 12863_2013_1358_MOESM9_ESM.pdf [file 12863_2013_1358_MOESM9_ESM.pdf]

**A** Pairs Plot of Polled Cattle

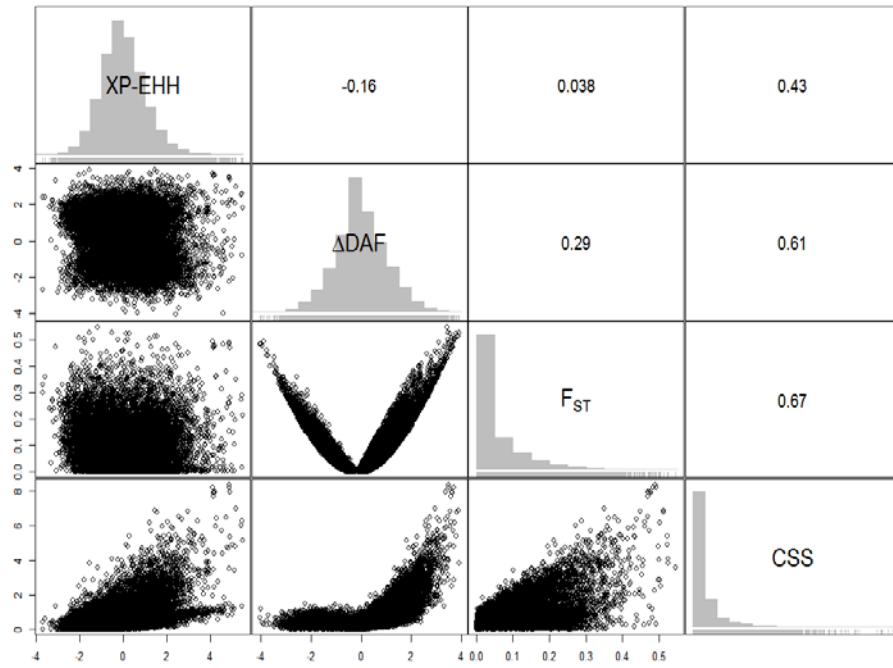

**B** Pairs Plot of Double Muscle Cattle

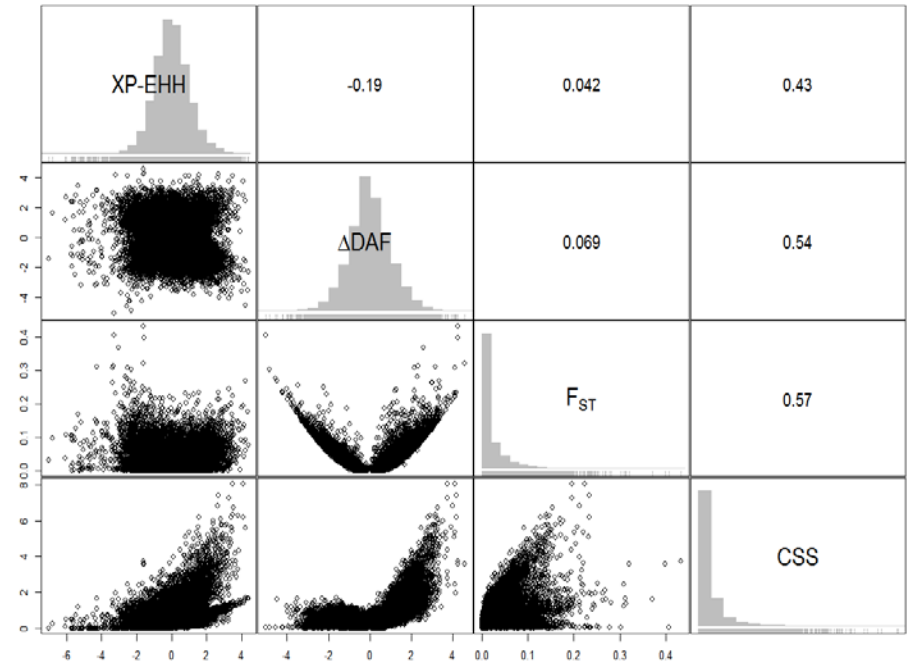

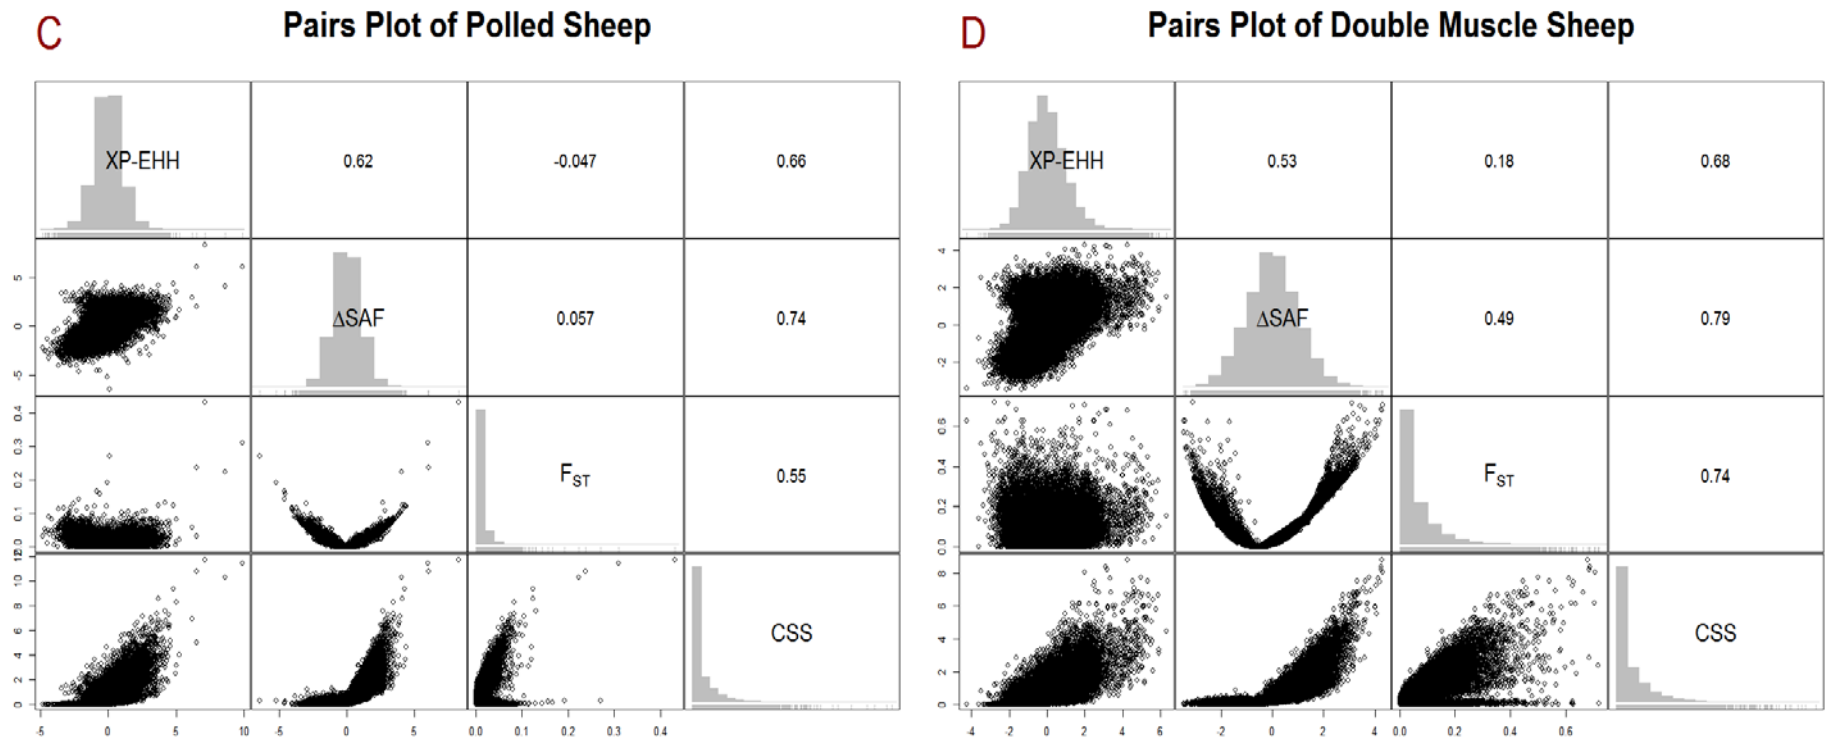

**Figure S6. Genome-wide pairs plots (lower diagonals), histograms (diagonals) and correlations (upper diagonals) for constituent (XP-EHH,  $\Delta$ SAF,  $F_{ST}$ ) and composite selection signals (CSS) for polled (A), double muscle (B), cattle polledness (C) and double muscling (D) in sheep.**
