# Supplementary material for: Composite selection signals can localize the trait specific genomic regions in multi-breed populations of cattle and sheep
Source: Springer Nature journal article supplement (doi:10.1186/1471-2156-15-34), 2014-01-01
Supplement: 12863_2013_1358_MOESM11_ESM.pdf [file 12863_2013_1358_MOESM11_ESM.pdf]

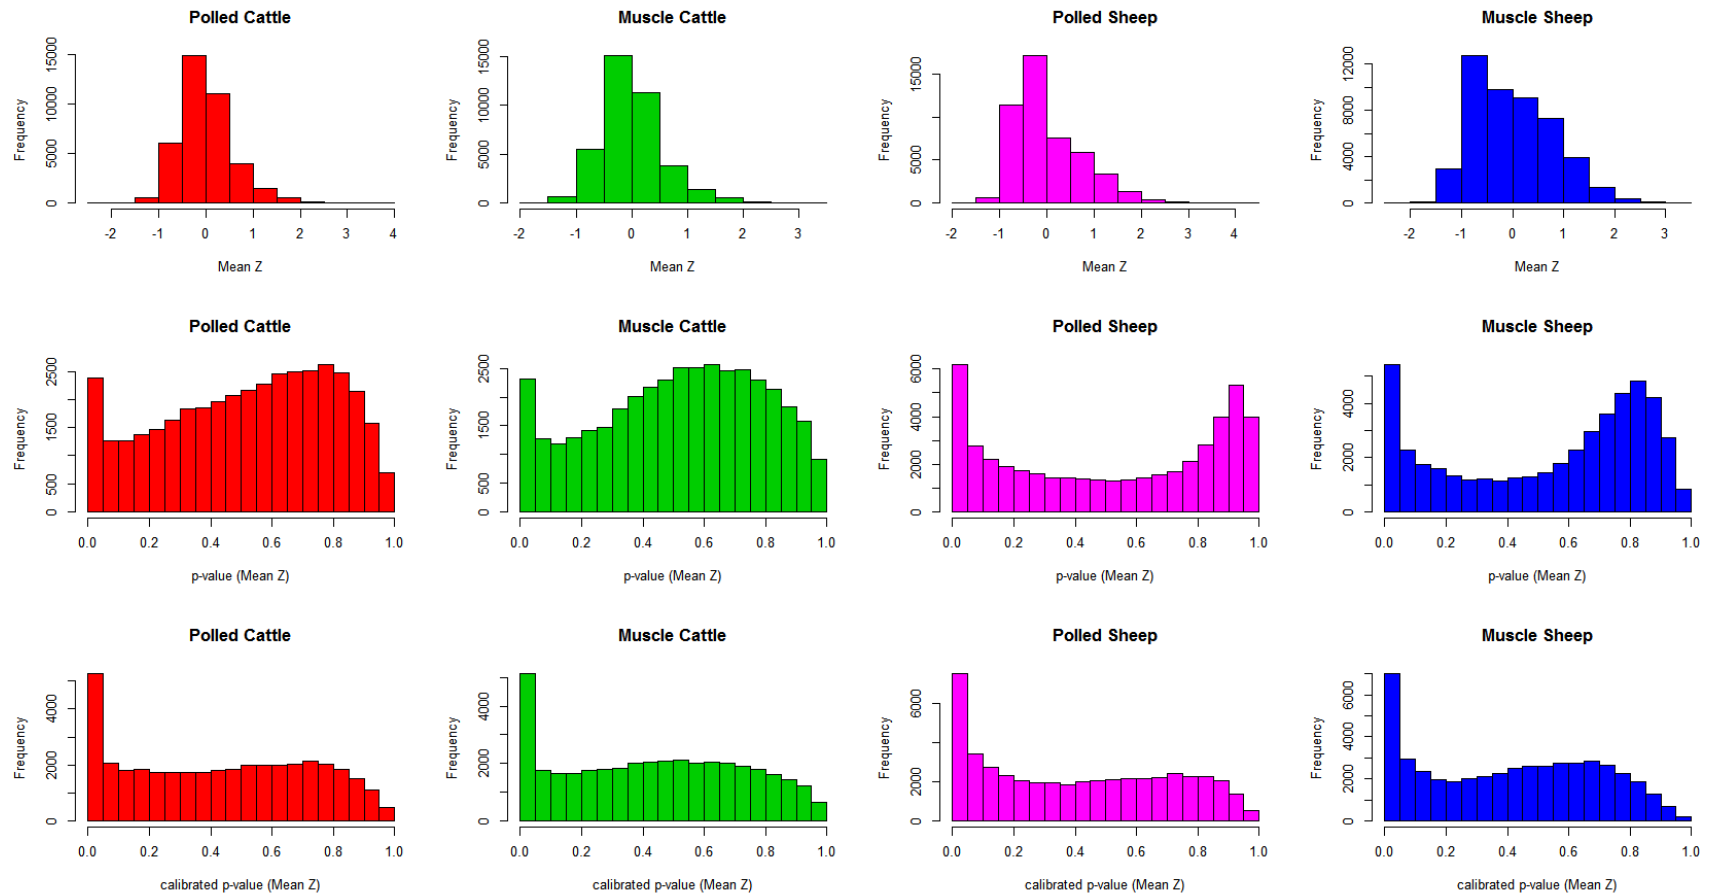

**Figure S7. Histograms of Mean Z, raw *p*-value and calibrated *p*-values distributions of the CSS:** Histograms (top to bottom in each column) for polled cattle (column 1, red), double muscle cattle (column 2, green), polled sheep (column 3, purple) and double muscle sheep (column 4, blue).
