# Supplementary material for: Composite selection signals can localize the trait specific genomic regions in multi-breed populations of cattle and sheep
Source: Springer Nature journal article supplement (doi:10.1186/1471-2156-15-34), 2014-01-01
Supplement: 12863_2013_1358_MOESM12_ESM.pdf [file 12863_2013_1358_MOESM12_ESM.pdf]

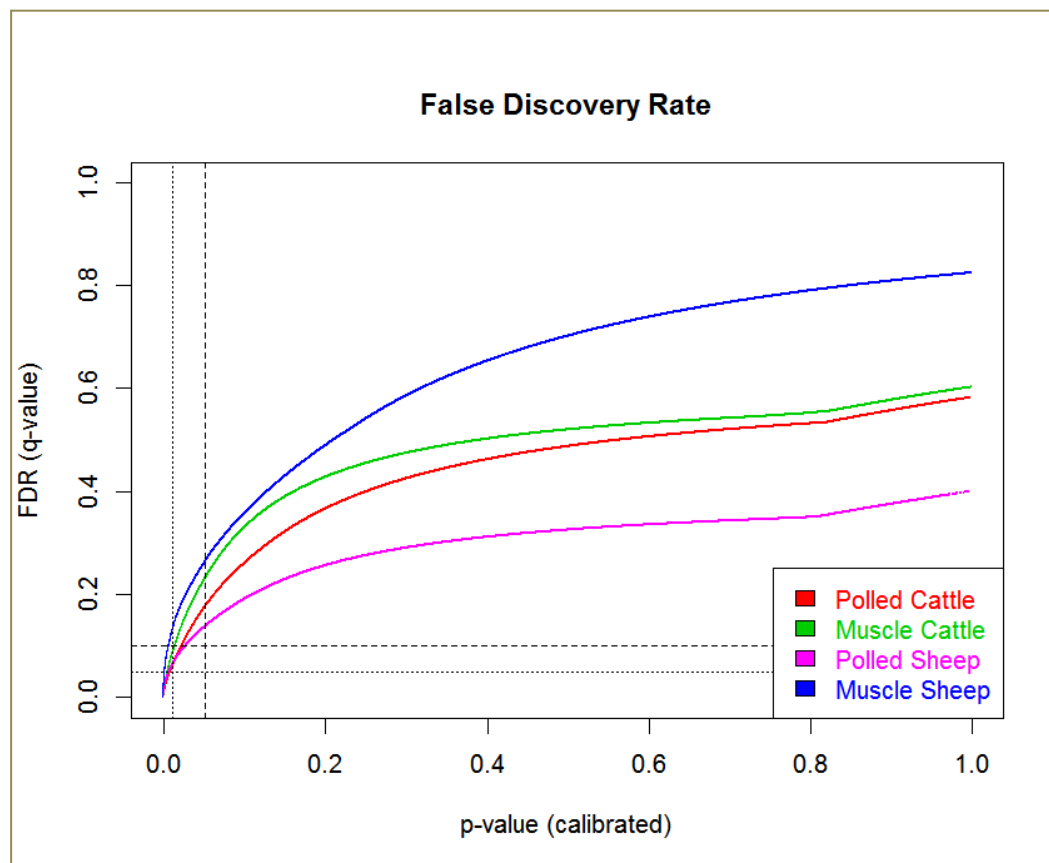

**Figure S8. False discovery rate (FDR) against  $p$ -values:**  $q$ -values were calculated from the calibrated  $p$ -values. Vertical dotted (.....) and dashed (-----) lines indicate calibrated  $p$ -values at 0.01 and 0.05, respectively. Horizontal dotted and dashed lines indicate  $q$ -values (FDR) at 0.05 and 0.1, respectively.
