# Supplementary material for: Composite selection signals can localize the trait specific genomic regions in multi-breed populations of cattle and sheep
Source: Springer Nature journal article supplement (doi:10.1186/1471-2156-15-34), 2014-01-01
Supplement: 12863_2013_1358_MOESM13_ESM.pdf [file 12863_2013_1358_MOESM13_ESM.pdf]

**Table S5. Selection signatures in European and African *Bos taurus* cattle populations.** Complete list of selection signatures identified by composite (CSS) and constituent (XPEHH, FST, ΔDAF) selection tests.

| BTA | Location <sup>a</sup> (Mb) | Tests           | Population         | Genes <sup>b</sup>                                                                                                                                                                                                                                                                                                                                                   |
|-----|----------------------------|-----------------|--------------------|----------------------------------------------------------------------------------------------------------------------------------------------------------------------------------------------------------------------------------------------------------------------------------------------------------------------------------------------------------------------|
| 1   | 1.76-2.13                  | CSS             | European           | SON, GART, LOC784171, TMEM50B, IFNGR2, IFNAR1, IL10RB, IFNAR2, LOC526226, <b>OLIG1, C1H21orf62, GCFC, SYNJ1</b> , C1H21ORF59, C1H21ORF63, URB1, MRAP, MIS18A                                                                                                                                                                                                         |
| 1   | 131.1-131.64               | CSS, XPEHH, FST | African            | COPB2, MRPS22, LOC616668, LOC616673, LOC783600, LOC616698, LOC616710, <b>FOXL2, PIK3CB, LOC100138061, FAIM, LOC100301027, LOC616840, CEP70</b> , ESYT3, MRAS, TXNDC6, ARMC8, DBR1, A4GNT, LOC100337454, DZIP1L                                                                                                                                                       |
| 1   | 150.90-151.00              | ΔDAF            | African            | CLDN14, LOC100337405, LOC100337422, <b>HLCS</b> , PIGP, TTC3, DSCR3, DYRK1A                                                                                                                                                                                                                                                                                          |
| 1   | 157.95-158.2               | CSS, ΔDAF       | African            | LOC100139888, LOC100297040, <b>[No gene]</b>                                                                                                                                                                                                                                                                                                                         |
| 1   | 82.0-82.2                  | CSS, XPEHH      | African            | DGKG, ETV5, LOC616971, TRA2B, <b>IGF2BP2, SENP2</b> , LIPH, TMEM41A, MAP3K13, EHHADH, LOC100140254, LOC615631                                                                                                                                                                                                                                                        |
| 3   | 10.52-10.71                | ΔDAF            | African            | DUSP23, CRP, APCS, LOC508986, LOC616952, LOC509261, LOC530601, <b>LOC504688, FCER1A, LOC538552, MPTX, DARC, CADM3</b> , IFI16, LOC519294, LOC526177, LOC517209, LOC514540, LOC505209, SPTA1                                                                                                                                                                          |
| 4   | 1.3-2.0                    | CSS             | African            | No gene                                                                                                                                                                                                                                                                                                                                                              |
| 4   | 51.97-52.01                | ΔDAF            | European           | ST7, LOC100337386, CAPZA2, <b>MET, LOC781951</b> , CAV1, CAV2, LOC100296613, TES                                                                                                                                                                                                                                                                                     |
| 5   | 26.60-26.91                | FST             | African / European | HOXC6, LOC100295249, LOC100295214, MIR196A-2, HOXC11, HOXC12, HOXC13, CALCOCO1, ATP5G2, <b>ATF7, NPFF, TARBP2, MAP3K12, PCBP2, PRR13, AMHR2, SP1, SP7, AAAS, C12orf10, PFDN5, ESPL1</b> , MFSD5, RARG, ITGB7, ZNF740, LOC516241, SOAT2, IGFBP6, SPRYD3, TENC1, EIF4B, KRT18, KRT8, KRT78, KRT79, KRT4, LOC100299984, LOC100336907, KERIA, LOC100336698, LOC100301161 |
| 6   | 53.1-53.4                  | CSS, ΔDAF       | African            | No gene                                                                                                                                                                                                                                                                                                                                                              |
| 6   | 88.8-89.3                  | CSS             | African            | SLC4A4, <b>GC, ADAMTS3</b> , COX18                                                                                                                                                                                                                                                                                                                                   |
| 7   | 39.5-40.0                  | CSS, XPEHH      | African            | COMMD10, ARL10, MIR1271, NOP16, HIGD2A, CLTB, FAF2, RNF44, CDHR2, GPRIN1, SNCB, EIF4E1B, TSPAN17, <b>UNC5A, HK3, UIMC1, LACTB, LOC533921, ZNF346, FGFR4</b> , LOC100336707, NSD1, RAB24, PRELID1, MXD3, LMAN2, RGS14, SLC34A1, PFN3, F12, GRK6, PRR7, DBN1, PDLIM7, DOK3, DDX41, FAM193B, LOC509184, LOC100139419                                                    |
| 7   | 43.39-43.42                | XPEHH           | European           | LOC787932, LOC787946, LOC787963, LOC788011, LOC788055, LOC616716, LOC788079, LOC506034, LOC509217, LOC514645, LOC539568, LOC510877, LOC788190, LOC511141, <b>LOC616938</b> , LOC515313, LOC615374, LOC510603, LOC788287, LOC618395, LOC510631, LOC788323, LOC507971, LOC509922, LOC788361, LOC524160, LOC517722, LOC518474, LOC100299275, MGC137030, MGC148293       |
| 8   | 43.80-44.40                | CSS, ΔDAF       | African            | DMRT2, DMRT3, DMRT1, <b>LOC100336820, KANK1, DOCK8</b> , LOC513962, LOC100300568, FOXD4L1, PGM5                                                                                                                                                                                                                                                                      |
| 8   | 83.05-83.57                | FST             | African / European | LOC531757, MIR2475, MIR23B, MIR27B, MIR24-1, <b>FANCC, LOC785608, TSPY, LOC100336570, FANCC, PTCH1</b> , LOC789977                                                                                                                                                                                                                                                   |

| BTA | Location <sup>a</sup> (Mb) | Tests                 | Population         | Genes <sup>b</sup>                                                                                                                                                                                                                                                                                                                                                                                                                                                                                                                                                                                 |
|-----|----------------------------|-----------------------|--------------------|----------------------------------------------------------------------------------------------------------------------------------------------------------------------------------------------------------------------------------------------------------------------------------------------------------------------------------------------------------------------------------------------------------------------------------------------------------------------------------------------------------------------------------------------------------------------------------------------------|
| 9   | 43.86-44.04                | FST                   | African / European | PDSS2, BEND3, C9H6ORF203, MGC127538, QRSL1, RTN4IP1, LOC526200, ATG5, LOC100336714, PRDM1                                                                                                                                                                                                                                                                                                                                                                                                                                                                                                          |
| 10  | 30.27-30.65                | ΔDAF                  | European           | FMN1, GREM1, SCG5, ARHGAP11A, GJD2, ACTC1, AQR, LOC786537, ATPBD4                                                                                                                                                                                                                                                                                                                                                                                                                                                                                                                                  |
| 11  | 98.93-99.31                | FST                   | African / European | SH2D3C, CDK9, FPGS, ENG, LOC100337088, AK1, ST6GALNAC6, ST6GALNAC2, PIP5KL1, DPM2, FAM102A, NAI1, SLC25A25, PTGES2, LCN2, C11H9orf16, CIZ1, DNM1, MIR199B, GOLGA2, LOC616324, TRUB2, COQ4, SLC27A4, URM1, CERCAM, ODF2, GLE1, SPTAN1, WDR34, SET, PKN3, LOC505354, ZER1, TBC1D13, ENDOG, LOC100138783, CCBL1, LRRC8A, PHYHD1, DOLK, NUP188, SH3GLB2, FAM73B, DOLPP1, CRAT, PPP2R4, IER5L                                                                                                                                                                                                           |
| 13  | 11.58-12.15                | CSS, XPEHH            | European           | LOC100337090, LOC100298513, LOC526041, LOC505099, LOC100337293, LOC509875, CAMK1D, CDC123, NUDT5, SEC61A2, DHTKD1, UPF2, LOC781700, ECHDC3                                                                                                                                                                                                                                                                                                                                                                                                                                                         |
| 14  | 1.46-1.80                  | CSS, XPEHH, FST, ΔDAF | European           | LOC788476, LOC100336014, LOC100295750, LOC100299291, LOC100294758, ZNF250, C14H8orf33, ZNF34, RPL8, ZNF7, COMM5, LOC532363, MIR2308, LOC618766, LRRC24, LRRC14, RECQL4, MFSD3, GPT, PPP1R16A, LOC100294916, FOXH1, LOC789523, CYHR1, NFKBIL2, SLC39A4, CPSF1, ADCK5, GPR172B, FBXL6, LOC789629, SCRT1, DGAT1, HSF1, BOP1, SCXB, HEATR7A, LOC523023, LOC509113, LOC509114, MAF1, SHARPIN, CYC1, GPAA1, EXOSC4, OPLAH, LOC100141215, LOC618305, GRINA, PARP10, LOC786966, MIR2309, LOC100337278, NRBP2, PUF60, LOC100295316, LOC506831, LOC524974, MAPK15, LOC100138046, ZNF623, LOC100295394, TSTA3 |
| 14  | 17.75-18.46                | ΔDAF                  | European           | TMEM65, FER1L6, LOC507013, ANXA13, KLHL38, FBXO32, WDYHV1, ATAD2, ZHX1, LOC539014, LOC521399, WDR67, DERL1, ZHX2                                                                                                                                                                                                                                                                                                                                                                                                                                                                                   |
| 14  | 24.15-24.79                | CSS, FST, ΔDAF        | European           | XKR4, TMEM68, TGS1, LYN, RPS20, MOS, PLAG1, CHCHD7, SDR16C5, SDR16C6, PENK                                                                                                                                                                                                                                                                                                                                                                                                                                                                                                                         |
| 14  | 79.36-80.08                | ΔDAF                  | African            | ATP6V0D2, MIR2311, LOC100196897, CA2, CA3, CA1, CA1, CA13, MGC133577, E2F5, LRCC1, SLC7A13, LOC506670, RALYL                                                                                                                                                                                                                                                                                                                                                                                                                                                                                       |
| 15  | 77.50-77.68                | XPEHH                 | African            | CREB3L1, DGKZ, MDK, CHRM4, AMBRA1, HARBI1, ATG13, ARHGAP1, ZNF408, LOC100336386, LOC781101, F2, CKAP5, MIR2319A, MIR2319B, LRP4, LOC617614, LOC509025, C15H11orf49                                                                                                                                                                                                                                                                                                                                                                                                                                 |
| 16  | 43.37-45.55                | CSS, XPEHH, FST       | European           | MAD2L2, FBXO6, FBXO44, FBXO2, PTCHD2, UBIAD1, MTOR, ANGPTL7, EXOSC10, SRM, MASP2, TARDBP, CASZ1, PEX14, DFFA, CORT, APITD1, PGD, LOC100337161, UBE4B, RBP7, NMNAT1, LOC100337372, CTNNBIP1, CLSTN1, PIK3CD, TMEM201, SLC25A33, SPSB1, H6PD, MIR34A, GPR157, SLC2A5, CA6, ENO1, RERE, LOC100295969, SLC45A1, LOC786597                                                                                                                                                                                                                                                                              |
| 19  | 10.20-11.44                | XPEHH                 | African            | Sep-04, LOC616486, LOC100297075, TEX14, MGC137055, RAD51C, TDGF1, PPM1E, TRIM37, FAM33A, MIR454, MIR301A, PRR11, MGC143117, GDPD1, YPEL2, AK3L1, DHX40, CLTC, PTRH2, TMEM49, MIR21, TUBD1, RPS6KB1, RNFT1, MED13, INTS2, LOC787304, BRIP1, TBX4                                                                                                                                                                                                                                                                                                                                                    |
| 19  | 10.90-10.92                | ΔDAF                  | European           | GDPD1, YPEL2, AK3L1, DHX40, CLTC, PTRH2, TMEM49, MIR21, TUBD1, RPS6KB1, RNFT1, MED13, INTS2                                                                                                                                                                                                                                                                                                                                                                                                                                                                                                        |
| 20  | 22.67-22.70                | ΔDAF                  | African            | MIER3, LOC540253, MAP3K1, [No gene], ANKRD55                                                                                                                                                                                                                                                                                                                                                                                                                                                                                                                                                       |
| 21  | 13.69-13.74                | ΔDAF                  | African            | NDUFB4, LOC100337442, [No gene]                                                                                                                                                                                                                                                                                                                                                                                                                                                                                                                                                                    |
| 22  | 49.70-50.01                | ΔDAF                  | African            | WDR82P1, PPM1M, TWF2, TLR9, ALAS1, WDR51A, DUSP7, RPL29, ACY1, ABHD14A, ABHD14B, PCBP4, GPR62, LOC507426, RRP9, IQCF1, IQCF5, IQCF2, LOC783987, LOC100125949, LOC785460, LOC618550, GRM2, TEX264, LOC784245, VPRBP, RBM15B, MANF, DOCK3, MAPKAPK3, CISH, HEMK1, C22H3ORF18, CACNA2D2                                                                                                                                                                                                                                                                                                               |
| 29  | 35.96-36.09                | ΔDAF                  | European           | NTM, [No gene], TMEM45B                                                                                                                                                                                                                                                                                                                                                                                                                                                                                                                                                                            |

<sup>a</sup> location represents the boundaries of the significant SNP clusters.

## Additional file 13

<sup>b</sup> Genes in red colour are located within the significant cluster and genes in black colour are included at a 0.5 Mb flanking regions on both sides of the significant cluster. Gene highlighted as bold have known functional role for various phenotypes under selection.
