# Supplementary material for: Composite selection signals can localize the trait specific genomic regions in multi-breed populations of cattle and sheep
Source: Springer Nature journal article supplement (doi:10.1186/1471-2156-15-34), 2014-01-01
Supplement: 12863_2013_1358_MOESM14_ESM.pdf [file 12863_2013_1358_MOESM14_ESM.pdf]

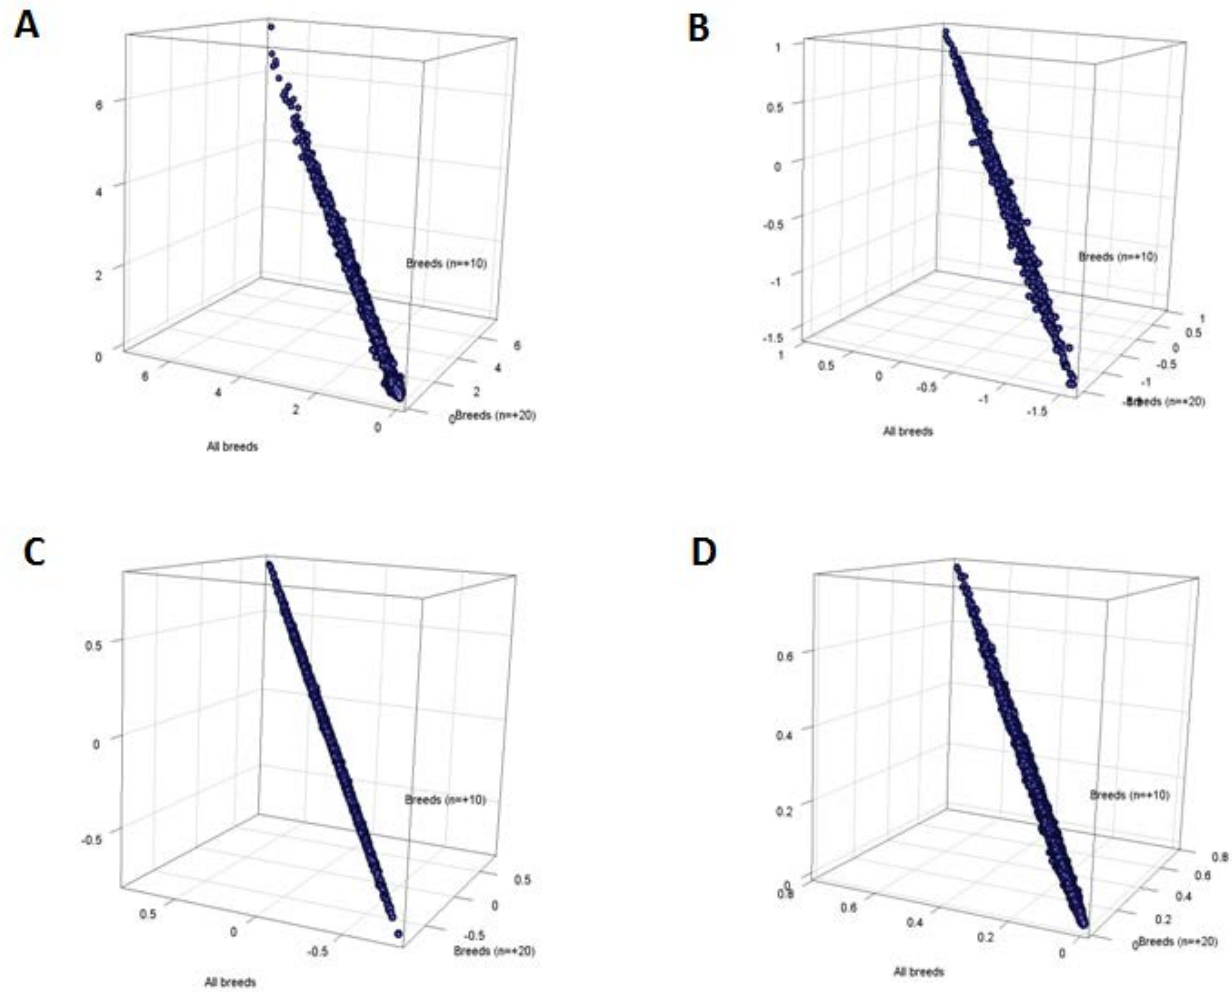

**Figure S9.** Genome-wide comparison of using SNP genotype data from all breeds (Total: 46 breeds and N= 847), breeds with minimum 10 samples (Total: 26 breeds and N=753) and breeds with minimum 20 samples (Total: 20 breeds and N=652) for computing CSS (A), XPEHH (B),  $\Delta DAF$  (C) and  $F_{ST}$  (D) for European *Bos taurus* cattle.
