# Supplementary material for: Composite selection signals can localize the trait specific genomic regions in multi-breed populations of cattle and sheep
Source: Springer Nature journal article supplement (doi:10.1186/1471-2156-15-34), 2014-01-01
Supplement: 12863_2013_1358_MOESM15_ESM.pdf [file 12863_2013_1358_MOESM15_ESM.pdf]

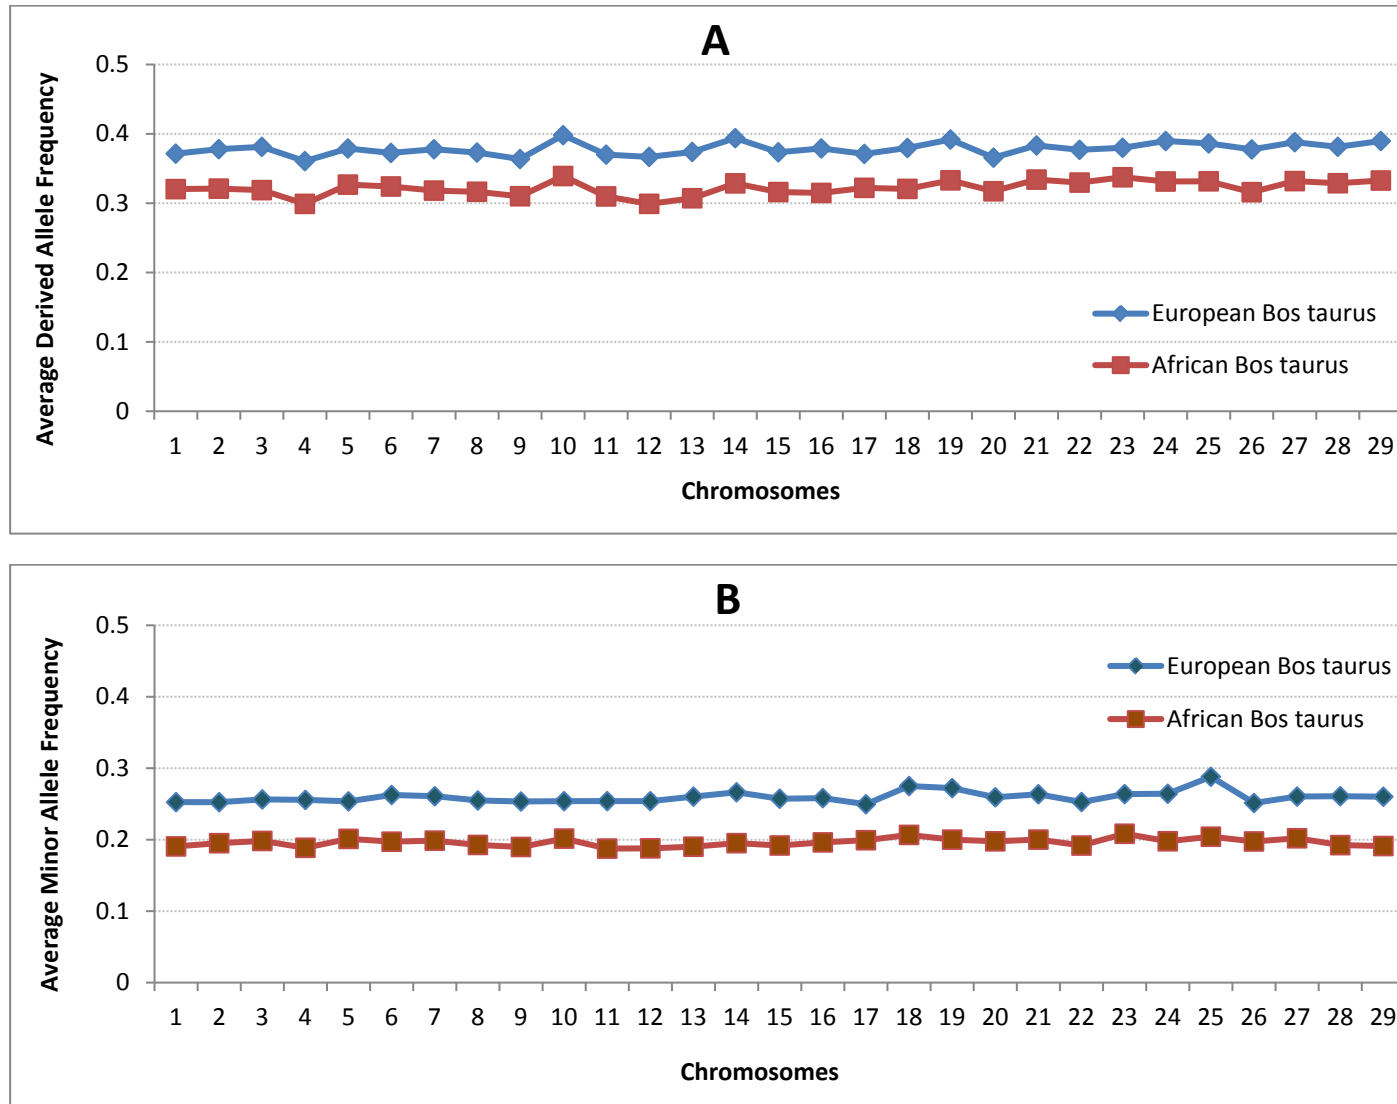

**Figure S10. Chromosome-wise comparison of (A) average derived allele frequencies (DAF) and (B) average minor allele frequencies (MAF) between European and African *Bos taurus* cattle breeds.** In addition to the  $\Delta$ DAF computation for cattle analyses, we also compared the chromosomal average DAF and MAF between geographic groups of European and African cattle to understand the genome-wide selection pressures.
