# Supplementary material for: Composite selection signals can localize the trait specific genomic regions in multi-breed populations of cattle and sheep
Source: Springer Nature journal article supplement (doi:10.1186/1471-2156-15-34), 2014-01-01

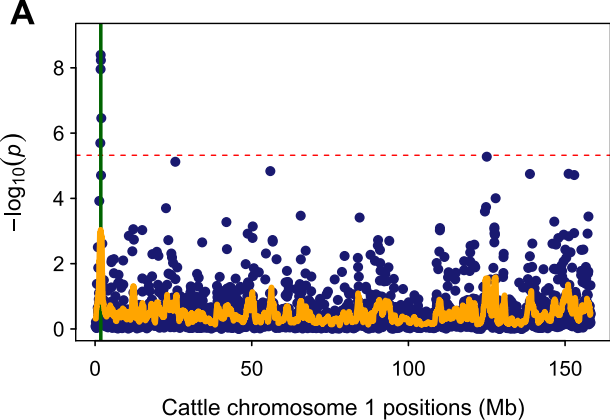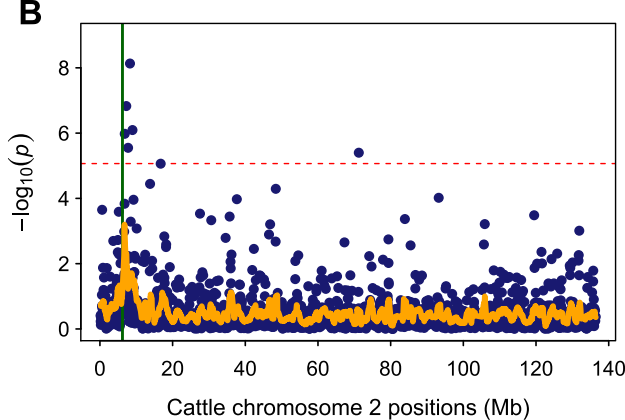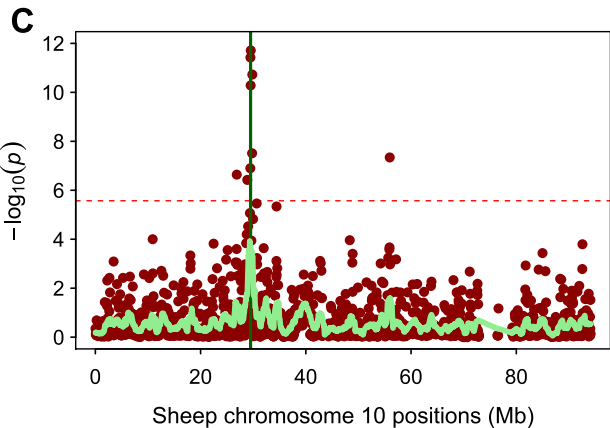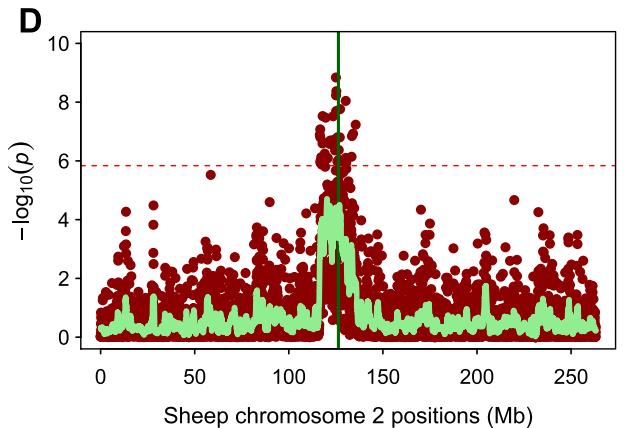

Supplement: 12863_2013_1358_MOESM16_ESM.pdf [file 12863_2013_1358_MOESM16_ESM.pdf]
